# Supplementary material for: Proteomics investigation of the changes in serum proteins after high- and low-flux hemodialysis
Source: Ren Fail. 2018 Oct 4;40(1):506–13. doi: 10.1080/0886022X.2018.1491406 (PMC6179064; doi:10.1080/0886022X.2018.1491406)
Supplement: Supplementary file [file IRNF_A_1491406_SM1098.xlsx]

## Sheet: Sheet1
Detailed data of serum proteins(High-flux HD versus Low-flux HD).
Entry	proteins	Ratio	HD	Change
A0A0B4J1X8	Immunoglobulin heavy variable 3-43 OS=Homo sapiens GN=IGHV3-43 PE=3 SV=1	1.01	High-flux HD	Increased
P18428	Lipopolysaccharide-binding protein OS=Homo sapiens GN=LBP PE=1 SV=3	1.02	High-flux HD	Increased
A0A0C4DH32	Protein IGHV3-20 (Fragment) OS=Homo sapiens GN=IGHV3-20 PE=1 SV=1	1.03	High-flux HD	Increased
Q5VY30	Retinol binding protein 4, plasma, isoform CRA_b OS=Homo sapiens GN=RBP4 PE=1 SV=2	1.03	High-flux HD	Increased
P01768	Immunoglobulin heavy variable 3-30 OS=Homo sapiens GN=IGHV3-30 PE=1 SV=2	1.06	High-flux HD	Increased
D6RFL4	Monocyte differentiation antigen CD14 (Fragment) OS=Homo sapiens GN=CD14 PE=1 SV=1	1.22	High-flux HD	Increased
P01782	Immunoglobulin heavy variable 3-9 OS=Homo sapiens GN=IGHV3-9 PE=1 SV=2	1.37	High-flux HD	Increased
A0A0C4DH68	Protein IGKV2-24 (Fragment) OS=Homo sapiens GN=IGKV2-24 PE=1 SV=1	1.39	High-flux HD	Increased
P02042	Hemoglobin subunit delta OS=Homo sapiens GN=HBD PE=1 SV=2	2.49	High-flux HD	Increased
P01768	Immunoglobulin heavy variable 3-30 OS=Homo sapiens GN=IGHV3-30 PE=1 SV=2	1.01	Low-flux HD	Increased
P01782	Immunoglobulin heavy variable 3-9 OS=Homo sapiens GN=IGHV3-9 PE=1 SV=2	1.09	Low-flux HD	Increased
A0A0C4DH32	Protein IGHV3-20 (Fragment) OS=Homo sapiens GN=IGHV3-20 PE=1 SV=1	1.22	Low-flux HD	Increased
A0A0C4DH68	Protein IGKV2-24 (Fragment) OS=Homo sapiens GN=IGKV2-24 PE=1 SV=1	1.24	Low-flux HD	Increased
A0A0B4J1X8	Immunoglobulin heavy variable 3-43 OS=Homo sapiens GN=IGHV3-43 PE=3 SV=1	1.27	Low-flux HD	Increased
Q5VY30	Retinol binding protein 4, plasma, isoform CRA_b OS=Homo sapiens GN=RBP4 PE=1 SV=2	1.32	Low-flux HD	Increased
D6RFL4	Monocyte differentiation antigen CD14 (Fragment) OS=Homo sapiens GN=CD14 PE=1 SV=1	1.52	Low-flux HD	Increased
P18428	Lipopolysaccharide-binding protein OS=Homo sapiens GN=LBP PE=1 SV=3	1.62	Low-flux HD	Increased
P02042	Hemoglobin subunit delta OS=Homo sapiens GN=HBD PE=1 SV=2	1.72	Low-flux HD	Increased
A0A140TA29	Complement C4-B OS=Homo sapiens GN=C4B PE=1 SV=1	1.02	High-flux HD	Increased
A0A0C4DH24	Protein IGKV6-21 (Fragment) OS=Homo sapiens GN=IGKV6-21 PE=1 SV=1	1.03	High-flux HD	Increased
P01767	Immunoglobulin heavy variable 3-53 OS=Homo sapiens GN=IGHV3-53 PE=1 SV=2	1.04	High-flux HD	Increased
Q14520	Hyaluronan-binding protein 2 OS=Homo sapiens GN=HABP2 PE=1 SV=1	1.04	High-flux HD	Increased
P02763	Alpha-1-acid glycoprotein 1 OS=Homo sapiens GN=ORM1 PE=1 SV=1	1.06	High-flux HD	Increased
C9JYS1	Dystroglycan (Fragment) OS=Homo sapiens GN=DAG1 PE=1 SV=8	1.13	High-flux HD	Increased
A0A087WSY6	Protein IGKV3D-15 (Fragment) OS=Homo sapiens GN=IGKV3D-15 PE=1 SV=6	1.15	High-flux HD	Increased
E7ETH0	Complement factor I OS=Homo sapiens GN=CFI PE=1 SV=1	1.15	High-flux HD	Increased
D6RA29	SPARC-like protein 1 (Fragment) OS=Homo sapiens GN=SPARCL1 PE=1 SV=1	1.3	High-flux HD	Increased
D6RAR4	Hepatocyte growth factor activator OS=Homo sapiens GN=HGFAC PE=1 SV=1	1.49	High-flux HD	Increased
A0A075B6P5	Immunoglobulin kappa variable 2-28 OS=Homo sapiens GN=IGKV2-28 PE=3 SV=1	1.63	High-flux HD	Increased
P00742	Coagulation factor X OS=Homo sapiens GN=F10 PE=1 SV=2	26.31	High-flux HD	Increased
P01861	Ig gamma-4 chain C region OS=Homo sapiens GN=IGHG4 PE=1 SV=1	1.01	Low-flux HD	Increased
P08603	Complement factor H OS=Homo sapiens GN=CFH PE=1 SV=4	1.01	Low-flux HD	Increased
P29622	Kallistatin OS=Homo sapiens GN=SERPINA4 PE=1 SV=3	1.01	Low-flux HD	Increased
P02760	Protein AMBP OS=Homo sapiens GN=AMBP PE=1 SV=1	1.02	Low-flux HD	Increased
P02776	Platelet factor 4 OS=Homo sapiens GN=PF4 PE=1 SV=2	1.02	Low-flux HD	Increased
A0A075B6N8	Ig gamma-3 chain C region (Fragment) OS=Homo sapiens GN=IGHG3 PE=1 SV=1	1.02	Low-flux HD	Increased
A0A0C4DH25	Immunoglobulin kappa variable 3-20 OS=Homo sapiens GN=IGKV3D-20 PE=3 SV=1	1.02	Low-flux HD	Increased
P68871	Hemoglobin subunit beta OS=Homo sapiens GN=HBB PE=1 SV=2	1.02	Low-flux HD	Increased
P02768	Serum albumin OS=Homo sapiens GN=ALB PE=1 SV=2	1.04	Low-flux HD	Increased
C9JV77	Alpha-2-HS-glycoprotein OS=Homo sapiens GN=AHSG PE=1 SV=1	1.05	Low-flux HD	Increased
A0A075B6K5	HCG2043239 (Fragment) OS=Homo sapiens GN=IGLV3-9 PE=1 SV=1	1.05	Low-flux HD	Increased
B3KWK7	Insulin-like growth factor binding protein 3, isoform CRA_b OS=Homo sapiens GN=IGFBP3 PE=1 SV=1	1.06	Low-flux HD	Increased
E9PFZ2	Ceruloplasmin OS=Homo sapiens GN=CP PE=1 SV=1	1.06	Low-flux HD	Increased
A0A0C4DH33	Immunoglobulin heavy variable 1-24 OS=Homo sapiens GN=IGHV1-24 PE=3 SV=1	1.06	Low-flux HD	Increased
P02647	Apolipoprotein A-I OS=Homo sapiens GN=APOA1 PE=1 SV=1	1.06	Low-flux HD	Increased
Q08380	Galectin-3-binding protein OS=Homo sapiens GN=LGALS3BP PE=1 SV=1	1.07	Low-flux HD	Increased
P04430	Immunoglobulin kappa variable 1-16 OS=Homo sapiens GN=IGKV1-16 PE=1 SV=2	1.07	Low-flux HD	Increased
A0A182DWH8	Protein SELENOP (Fragment) OS=Homo sapiens GN=SELENOP PE=1 SV=1	1.07	Low-flux HD	Increased
P04004	Vitronectin OS=Homo sapiens GN=VTN PE=1 SV=1	1.08	Low-flux HD	Increased
P23142	Fibulin-1 OS=Homo sapiens GN=FBLN1 PE=1 SV=4	1.08	Low-flux HD	Increased
B7ZKJ8	ITIH4 protein OS=Homo sapiens GN=ITIH4 PE=1 SV=1	1.08	Low-flux HD	Increased
A0A0C4DH38	Protein IGHV5-51 (Fragment) OS=Homo sapiens GN=IGHV5-51 PE=1 SV=1	1.08	Low-flux HD	Increased
P01593	Immunoglobulin kappa variable 1D-33 OS=Homo sapiens GN=IGKV1D-33 PE=1 SV=2	1.09	Low-flux HD	Increased
P01834	Ig kappa chain C region OS=Homo sapiens GN=IGKC PE=1 SV=1	1.09	Low-flux HD	Increased
P04432	Immunoglobulin kappa variable 1D-39 OS=Homo sapiens GN=IGKV1D-39 PE=3 SV=2	1.09	Low-flux HD	Increased
A0A0C4DH29	Immunoglobulin heavy variable 1-3 OS=Homo sapiens GN=IGHV1-3 PE=3 SV=1	1.09	Low-flux HD	Increased
P02790	Hemopexin OS=Homo sapiens GN=HPX PE=1 SV=2	1.09	Low-flux HD	Increased
A0A0J9YVT0	Immunoglobulin heavy variable 3-33 (Fragment) OS=Homo sapiens GN=IGHV3-33 PE=4 SV=1	1.09	Low-flux HD	Increased
P06310	Immunoglobulin kappa variable 2-30 OS=Homo sapiens GN=IGKV2-30 PE=3 SV=2	1.11	Low-flux HD	Increased
A0A0C4DH31	Immunoglobulin heavy variable 1-18 OS=Homo sapiens GN=IGHV1-18 PE=3 SV=1	1.12	Low-flux HD	Increased
P04114	Apolipoprotein B-100 OS=Homo sapiens GN=APOB PE=1 SV=2	1.13	Low-flux HD	Increased
A0A0A0MS08	Ig gamma-1 chain C region (Fragment) OS=Homo sapiens GN=IGHG1 PE=1 SV=1	1.13	Low-flux HD	Increased
A0A075B6K4	HCG2043238 (Fragment) OS=Homo sapiens GN=IGLV3-10 PE=1 SV=1	1.14	Low-flux HD	Increased
P01859	Ig gamma-2 chain C region OS=Homo sapiens GN=IGHG2 PE=1 SV=2	1.14	Low-flux HD	Increased
P35858	Insulin-like growth factor-binding protein complex acid labile subunit OS=Homo sapiens GN=IGFALS PE=1 SV=1	1.14	Low-flux HD	Increased
A0A075B6S5	Protein IGKV1-27 (Fragment) OS=Homo sapiens GN=IGKV1-27 PE=1 SV=1	1.14	Low-flux HD	Increased
A0A0J9YY99	Uncharacterized protein (Fragment) OS=Homo sapiens PE=1 SV=1	1.14	Low-flux HD	Increased
P01611	Immunoglobulin kappa variable 1D-12 OS=Homo sapiens GN=IGKV1D-12 PE=1 SV=2	1.16	Low-flux HD	Increased
P01714	Immunoglobulin lambda variable 3-19 OS=Homo sapiens GN=IGLV3-19 PE=1 SV=2	1.16	Low-flux HD	Increased
A0A075B6N7	Ig alpha-2 chain C region (Fragment) OS=Homo sapiens GN=IGHA2 PE=1 SV=1	1.16	Low-flux HD	Increased
P02775	Platelet basic protein OS=Homo sapiens GN=PPBP PE=1 SV=3	1.17	Low-flux HD	Increased
P05160	Coagulation factor XIII B chain OS=Homo sapiens GN=F13B PE=1 SV=3	1.17	Low-flux HD	Increased
O75636	Ficolin-3 OS=Homo sapiens GN=FCN3 PE=1 SV=2	1.17	Low-flux HD	Increased
C9JMX4	Insulin-like growth factor-binding protein 3 (Fragment) OS=Homo sapiens GN=IGFBP3 PE=1 SV=1	1.17	Low-flux HD	Increased
A0A0B4J1V1	Immunoglobulin heavy variable 3-21 OS=Homo sapiens GN=IGHV3-21 PE=1 SV=1	1.18	Low-flux HD	Increased
F5H7G1	Complement component C8 beta chain OS=Homo sapiens GN=C8B PE=1 SV=1	1.18	Low-flux HD	Increased
E5RJF6	Carbonic anhydrase 1 (Fragment) OS=Homo sapiens GN=CA1 PE=1 SV=1	1.19	Low-flux HD	Increased
E9PDD2	Vascular cell adhesion protein 1 OS=Homo sapiens GN=VCAM1 PE=1 SV=1	1.19	Low-flux HD	Increased
J3KRP0	Beta-Ala-His dipeptidase OS=Homo sapiens GN=CNDP1 PE=1 SV=2	1.2	Low-flux HD	Increased
P00734	Prothrombin OS=Homo sapiens GN=F2 PE=1 SV=2	1.2	Low-flux HD	Increased
A0A0J9YVU5	Immunoglobulin heavy variable 2-70 (Fragment) OS=Homo sapiens GN=IGHV2-70 PE=4 SV=1	1.23	Low-flux HD	Increased
P08519	Apolipoprotein(a) OS=Homo sapiens GN=LPA PE=1 SV=1	1.23	Low-flux HD	Increased
P15169	Carboxypeptidase N catalytic chain OS=Homo sapiens GN=CPN1 PE=1 SV=1	1.24	Low-flux HD	Increased
P22792	Carboxypeptidase N subunit 2 OS=Homo sapiens GN=CPN2 PE=1 SV=3	1.25	Low-flux HD	Increased
P69905	Hemoglobin subunit alpha OS=Homo sapiens GN=HBA1 PE=1 SV=2	1.25	Low-flux HD	Increased
A0A0A0MRJ7	Coagulation factor V OS=Homo sapiens GN=F5 PE=1 SV=1	1.25	Low-flux HD	Increased
A0A0C4DH42	Protein IGHV3-66 (Fragment) OS=Homo sapiens GN=IGHV3-66 PE=4 SV=1	1.25	Low-flux HD	Increased
P01602	Immunoglobulin kappa variable 1-5 OS=Homo sapiens GN=IGKV1-5 PE=1 SV=2	1.26	Low-flux HD	Increased
A0A087WSY5	Carboxypeptidase B2 OS=Homo sapiens GN=CPB2 PE=1 SV=1	1.26	Low-flux HD	Increased
P07360	Complement component C8 gamma chain OS=Homo sapiens GN=C8G PE=1 SV=3	1.28	Low-flux HD	Increased
A0A0J9YX35	Uncharacterized protein (Fragment) OS=Homo sapiens PE=1 SV=1	1.28	Low-flux HD	Increased
F8VYK9	Insulin-like growth factor-binding protein 6 OS=Homo sapiens GN=IGFBP6 PE=1 SV=1	1.32	Low-flux HD	Increased
A0A075B6Q5	Immunoglobulin heavy variable 3-64 OS=Homo sapiens GN=IGHV3-64 PE=3 SV=1	1.33	Low-flux HD	Increased
P02671	Fibrinogen alpha chain OS=Homo sapiens GN=FGA PE=1 SV=2	1.33	Low-flux HD	Increased
P02747	Complement C1q subcomponent subunit C OS=Homo sapiens GN=C1QC PE=1 SV=3	1.35	Low-flux HD	Increased
A0A0B4J1V6	Protein IGHV3-73 (Fragment) OS=Homo sapiens GN=IGHV3-73 PE=1 SV=1	1.36	Low-flux HD	Increased
A0A0B4J2D9	Protein IGKV1D-13 (Fragment) OS=Homo sapiens GN=IGKV1D-13 PE=1 SV=1	1.37	Low-flux HD	Increased
P19827	Inter-alpha-trypsin inhibitor heavy chain H1 OS=Homo sapiens GN=ITIH1 PE=1 SV=3	1.38	Low-flux HD	Increased
P01718	Immunoglobulin lambda variable 3-27 OS=Homo sapiens GN=IGLV3-27 PE=1 SV=2	1.39	Low-flux HD	Increased
P06312	Immunoglobulin kappa variable 4-1 OS=Homo sapiens GN=IGKV4-1 PE=1 SV=1	1.39	Low-flux HD	Increased
A0A0G2JPA8	Alpha-2-antiplasmin OS=Homo sapiens GN=SERPINF2 PE=1 SV=1	1.4	Low-flux HD	Increased
F5H1E8	Alpha-2-macroglobulin OS=Homo sapiens GN=A2M PE=1 SV=1	1.4	Low-flux HD	Increased
H0YA69	Matrix metalloproteinase-23 (Fragment) OS=Homo sapiens GN=MMP23B PE=1 SV=1	1.4	Low-flux HD	Increased
A0A075B6I6	Protein IGLV1-50 (Fragment) OS=Homo sapiens GN=IGLV1-50 PE=1 SV=1	1.42	Low-flux HD	Increased
P98160	Basement membrane-specific heparan sulfate proteoglycan core protein OS=Homo sapiens GN=HSPG2 PE=1 SV=4	1.44	Low-flux HD	Increased
P55058	Phospholipid transfer protein OS=Homo sapiens GN=PLTP PE=1 SV=1	1.46	Low-flux HD	Increased
P41222	Prostaglandin-H2 D-isomerase OS=Homo sapiens GN=PTGDS PE=1 SV=1	1.62	Low-flux HD	Increased
P04275	von Willebrand factor OS=Homo sapiens GN=VWF PE=1 SV=4	1.63	Low-flux HD	Increased
P31327	Carbamoyl-phosphate synthase [ammonia], mitochondrial OS=Homo sapiens GN=CPS1 PE=1 SV=2	0.28	High-flux HD	Decreased
C9JXI5	Transmembrane protein 198 (Fragment) OS=Homo sapiens GN=TMEM198 PE=1 SV=1	0.37	High-flux HD	Decreased
K7ER74	Protein APOC4-APOC2 OS=Homo sapiens GN=APOC4-APOC2 PE=1 SV=1	0.42	High-flux HD	Decreased
A0A0J9YXX1	Uncharacterized protein (Fragment) OS=Homo sapiens PE=1 SV=1	0.53	High-flux HD	Decreased
K7ERI9	Apolipoprotein C-I (Fragment) OS=Homo sapiens GN=APOC1 PE=1 SV=1	0.56	High-flux HD	Decreased
C9JEE0	Immunoglobulin lambda-like polypeptide 1 (Fragment) OS=Homo sapiens GN=IGLL1 PE=1 SV=1	0.58	High-flux HD	Decreased
A0A0A0MSV6	Complement C1q subcomponent subunit B (Fragment) OS=Homo sapiens GN=C1QB PE=1 SV=6	0.66	High-flux HD	Decreased
P43251	Biotinidase OS=Homo sapiens GN=BTD PE=1 SV=2	0.68	High-flux HD	Decreased
P01008	Antithrombin-III OS=Homo sapiens GN=SERPINC1 PE=1 SV=1	0.69	High-flux HD	Decreased
P27169	Serum paraoxonase/arylesterase 1 OS=Homo sapiens GN=PON1 PE=1 SV=3	0.69	High-flux HD	Decreased
C9JF17	Apolipoprotein D (Fragment) OS=Homo sapiens GN=APOD PE=1 SV=1	0.7	High-flux HD	Decreased
P55056	Apolipoprotein C-IV OS=Homo sapiens GN=APOC4 PE=1 SV=1	0.71	High-flux HD	Decreased
B4E1Z4	Uncharacterized protein OS=Homo sapiens PE=1 SV=1	0.72	High-flux HD	Decreased
D6RF35	Vitamin D-binding protein OS=Homo sapiens GN=GC PE=1 SV=1	0.74	High-flux HD	Decreased
A0A075B6N9	Ig mu chain C region (Fragment) OS=Homo sapiens GN=IGHM PE=1 SV=2	0.75	High-flux HD	Decreased
P01780	Immunoglobulin heavy variable 3-7 OS=Homo sapiens GN=IGHV3-7 PE=1 SV=2	0.77	High-flux HD	Decreased
V9GYM3	Apolipoprotein A-II OS=Homo sapiens GN=APOA2 PE=1 SV=1	0.79	High-flux HD	Decreased
O95445	Apolipoprotein M OS=Homo sapiens GN=APOM PE=1 SV=2	0.8	High-flux HD	Decreased
P02749	Beta-2-glycoprotein 1 OS=Homo sapiens GN=APOH PE=1 SV=3	0.8	High-flux HD	Decreased
H0YAC1	Plasma kallikrein (Fragment) OS=Homo sapiens GN=KLKB1 PE=1 SV=1	0.8	High-flux HD	Decreased
P31327	Carbamoyl-phosphate synthase [ammonia], mitochondrial OS=Homo sapiens GN=CPS1 PE=1 SV=2	0.17	Low-flux HD	Decreased
C9JXI5	Transmembrane protein 198 (Fragment) OS=Homo sapiens GN=TMEM198 PE=1 SV=1	0.39	Low-flux HD	Decreased
K7ER74	Protein APOC4-APOC2 OS=Homo sapiens GN=APOC4-APOC2 PE=1 SV=1	0.5	Low-flux HD	Decreased
C9JEE0	Immunoglobulin lambda-like polypeptide 1 (Fragment) OS=Homo sapiens GN=IGLL1 PE=1 SV=1	0.55	Low-flux HD	Decreased
K7ERI9	Apolipoprotein C-I (Fragment) OS=Homo sapiens GN=APOC1 PE=1 SV=1	0.65	Low-flux HD	Decreased
P02749	Beta-2-glycoprotein 1 OS=Homo sapiens GN=APOH PE=1 SV=3	0.68	Low-flux HD	Decreased
V9GYM3	Apolipoprotein A-II OS=Homo sapiens GN=APOA2 PE=1 SV=1	0.71	Low-flux HD	Decreased
A0A0A0MSV6	Complement C1q subcomponent subunit B (Fragment) OS=Homo sapiens GN=C1QB PE=1 SV=6	0.78	Low-flux HD	Decreased
A0A0J9YXX1	Uncharacterized protein (Fragment) OS=Homo sapiens PE=1 SV=1	0.78	Low-flux HD	Decreased
O95445	Apolipoprotein M OS=Homo sapiens GN=APOM PE=1 SV=2	0.82	Low-flux HD	Decreased
C9JF17	Apolipoprotein D (Fragment) OS=Homo sapiens GN=APOD PE=1 SV=1	0.83	Low-flux HD	Decreased
D6RF35	Vitamin D-binding protein OS=Homo sapiens GN=GC PE=1 SV=1	0.84	Low-flux HD	Decreased
P01008	Antithrombin-III OS=Homo sapiens GN=SERPINC1 PE=1 SV=1	0.87	Low-flux HD	Decreased
A0A075B6N9	Ig mu chain C region (Fragment) OS=Homo sapiens GN=IGHM PE=1 SV=2	0.87	Low-flux HD	Decreased
P55056	Apolipoprotein C-IV OS=Homo sapiens GN=APOC4 PE=1 SV=1	0.87	Low-flux HD	Decreased
P01780	Immunoglobulin heavy variable 3-7 OS=Homo sapiens GN=IGHV3-7 PE=1 SV=2	0.92	Low-flux HD	Decreased
P27169	Serum paraoxonase/arylesterase 1 OS=Homo sapiens GN=PON1 PE=1 SV=3	0.92	Low-flux HD	Decreased
H0YAC1	Plasma kallikrein (Fragment) OS=Homo sapiens GN=KLKB1 PE=1 SV=1	0.93	Low-flux HD	Decreased
P43251	Biotinidase OS=Homo sapiens GN=BTD PE=1 SV=2	0.93	Low-flux HD	Decreased
B4E1Z4	Uncharacterized protein OS=Homo sapiens PE=1 SV=1	0.97	Low-flux HD	Decreased
A0A0A0MT99	Protein IGLJ3 (Fragment) OS=Homo sapiens GN=IGLJ3 PE=1 SV=1	0.43	High-flux HD	Decreased
O75592	E3 ubiquitin-protein ligase MYCBP2 OS=Homo sapiens GN=MYCBP2 PE=1 SV=3	0.45	High-flux HD	Decreased
J3QR90	Dynein regulatory complex subunit 3 (Fragment) OS=Homo sapiens GN=DRC3 PE=4 SV=2	0.46	High-flux HD	Decreased
A0A075B7D4	Protein IGKV1OR2-108 (Fragment) OS=Homo sapiens GN=IGKV1OR2-108 PE=1 SV=1	0.53	High-flux HD	Decreased
P01876	Ig alpha-1 chain C region OS=Homo sapiens GN=IGHA1 PE=1 SV=2	0.54	High-flux HD	Decreased
K7ERX7	ATP synthase subunit alpha, mitochondrial (Fragment) OS=Homo sapiens GN=ATP5A1 PE=1 SV=1	0.55	High-flux HD	Decreased
A0A087X0P6	Protein IGKV2D-29 OS=Homo sapiens GN=IGKV2D-29 PE=1 SV=1	0.55	High-flux HD	Decreased
A0A075B6I9	Protein IGLV7-46 (Fragment) OS=Homo sapiens GN=IGLV7-46 PE=1 SV=4	0.56	High-flux HD	Decreased
P01700	Immunoglobulin lambda variable 1-47 OS=Homo sapiens GN=IGLV1-47 PE=1 SV=2	0.57	High-flux HD	Decreased
P01701	Immunoglobulin lambda variable 1-51 OS=Homo sapiens GN=IGLV1-51 PE=1 SV=2	0.57	High-flux HD	Decreased
O14791	Apolipoprotein L1 OS=Homo sapiens GN=APOL1 PE=1 SV=5	0.59	High-flux HD	Decreased
Q13790	Apolipoprotein F OS=Homo sapiens GN=APOF PE=1 SV=2	0.59	High-flux HD	Decreased
P06312	Immunoglobulin kappa variable 4-1 OS=Homo sapiens GN=IGKV4-1 PE=1 SV=1	0.6	High-flux HD	Decreased
P10909	Clusterin OS=Homo sapiens GN=CLU PE=1 SV=1	0.62	High-flux HD	Decreased
P43652	Afamin OS=Homo sapiens GN=AFM PE=1 SV=1	0.63	High-flux HD	Decreased
E9PG08	Fetuin-B OS=Homo sapiens GN=FETUB PE=1 SV=1	0.63	High-flux HD	Decreased
P05109	Protein S100-A8 OS=Homo sapiens GN=S100A8 PE=1 SV=1	0.65	High-flux HD	Decreased
A0A0A0MT69	Protein IGKJ4 (Fragment) OS=Homo sapiens GN=IGKJ4 PE=1 SV=1	0.65	High-flux HD	Decreased
A0A0C4DH31	Immunoglobulin heavy variable 1-18 OS=Homo sapiens GN=IGHV1-18 PE=3 SV=1	0.65	High-flux HD	Decreased
O43866	CD5 antigen-like OS=Homo sapiens GN=CD5L PE=1 SV=1	0.65	High-flux HD	Decreased
A0A096LPE2	Protein SAA2-SAA4 OS=Homo sapiens GN=SAA2-SAA4 PE=4 SV=1	0.65	High-flux HD	Decreased
M0R0Q9	Complement C3 (Fragment) OS=Homo sapiens GN=C3 PE=1 SV=1	0.66	High-flux HD	Decreased
P04114	Apolipoprotein B-100 OS=Homo sapiens GN=APOB PE=1 SV=2	0.66	High-flux HD	Decreased
P05543	Thyroxine-binding globulin OS=Homo sapiens GN=SERPINA7 PE=1 SV=2	0.66	High-flux HD	Decreased
A0A0A0MS51	Gelsolin OS=Homo sapiens GN=GSN PE=1 SV=1	0.66	High-flux HD	Decreased
A0A0G2JPA8	Alpha-2-antiplasmin OS=Homo sapiens GN=SERPINF2 PE=1 SV=1	0.66	High-flux HD	Decreased
E9PHK0	Tetranectin OS=Homo sapiens GN=CLEC3B PE=1 SV=1	0.67	High-flux HD	Decreased
P01011	Alpha-1-antichymotrypsin OS=Homo sapiens GN=SERPINA3 PE=1 SV=2	0.67	High-flux HD	Decreased
P02649	Apolipoprotein E OS=Homo sapiens GN=APOE PE=1 SV=1	0.68	High-flux HD	Decreased
E9PGN7	Plasma protease C1 inhibitor OS=Homo sapiens GN=SERPING1 PE=1 SV=1	0.68	High-flux HD	Decreased
P00747	Plasminogen OS=Homo sapiens GN=PLG PE=1 SV=2	0.69	High-flux HD	Decreased
A0A0J9YY99	Uncharacterized protein (Fragment) OS=Homo sapiens PE=1 SV=1	0.69	High-flux HD	Decreased
E9PDD2	Vascular cell adhesion protein 1 OS=Homo sapiens GN=VCAM1 PE=1 SV=1	0.69	High-flux HD	Decreased
A0A087WW43	Inter-alpha-trypsin inhibitor heavy chain H3 OS=Homo sapiens GN=ITIH3 PE=1 SV=1	0.7	High-flux HD	Decreased
P15169	Carboxypeptidase N catalytic chain OS=Homo sapiens GN=CPN1 PE=1 SV=1	0.7	High-flux HD	Decreased
J3KRP0	Beta-Ala-His dipeptidase OS=Homo sapiens GN=CNDP1 PE=1 SV=2	0.71	High-flux HD	Decreased
A0A0B4J1V0	Immunoglobulin heavy variable 3-15 OS=Homo sapiens GN=IGHV3-15 PE=3 SV=1	0.71	High-flux HD	Decreased
A0A0B4J1V1	Immunoglobulin heavy variable 3-21 OS=Homo sapiens GN=IGHV3-21 PE=1 SV=1	0.71	High-flux HD	Decreased
P01031	Complement C5 OS=Homo sapiens GN=C5 PE=1 SV=4	0.71	High-flux HD	Decreased
P05546	Heparin cofactor 2 OS=Homo sapiens GN=SERPIND1 PE=1 SV=3	0.71	High-flux HD	Decreased
P07357	Complement component C8 alpha chain OS=Homo sapiens GN=C8A PE=1 SV=2	0.71	High-flux HD	Decreased
B4DQI1	Complement C2 OS=Homo sapiens GN=C2 PE=1 SV=1	0.71	High-flux HD	Decreased
B7ZKJ8	ITIH4 protein OS=Homo sapiens GN=ITIH4 PE=1 SV=1	0.71	High-flux HD	Decreased
B0YIW2	Apolipoprotein C-III OS=Homo sapiens GN=APOC3 PE=1 SV=1	0.72	High-flux HD	Decreased
E9PNW4	CD59 glycoprotein OS=Homo sapiens GN=CD59 PE=1 SV=1	0.72	High-flux HD	Decreased
P01019	Angiotensinogen OS=Homo sapiens GN=AGT PE=1 SV=1	0.72	High-flux HD	Decreased
P02748	Complement component C9 OS=Homo sapiens GN=C9 PE=1 SV=2	0.72	High-flux HD	Decreased
P02775	Platelet basic protein OS=Homo sapiens GN=PPBP PE=1 SV=3	0.72	High-flux HD	Decreased
P04004	Vitronectin OS=Homo sapiens GN=VTN PE=1 SV=1	0.72	High-flux HD	Decreased
P35858	Insulin-like growth factor-binding protein complex acid labile subunit OS=Homo sapiens GN=IGFALS PE=1 SV=1	0.72	High-flux HD	Decreased
Q08380	Galectin-3-binding protein OS=Homo sapiens GN=LGALS3BP PE=1 SV=1	0.72	High-flux HD	Decreased
A0A075B6K4	HCG2043238 (Fragment) OS=Homo sapiens GN=IGLV3-10 PE=1 SV=1	0.72	High-flux HD	Decreased
P36955	Pigment epithelium-derived factor OS=Homo sapiens GN=SERPINF1 PE=1 SV=4	0.73	High-flux HD	Decreased
A0A0J9YX35	Uncharacterized protein (Fragment) OS=Homo sapiens PE=1 SV=1	0.73	High-flux HD	Decreased
P04275	von Willebrand factor OS=Homo sapiens GN=VWF PE=1 SV=4	0.74	High-flux HD	Decreased
A0A075B6K5	HCG2043239 (Fragment) OS=Homo sapiens GN=IGLV3-9 PE=1 SV=1	0.74	High-flux HD	Decreased
C9IZP8	Complement C1s subcomponent (Fragment) OS=Homo sapiens GN=C1S PE=1 SV=1	0.74	High-flux HD	Decreased
P25311	Zinc-alpha-2-glycoprotein OS=Homo sapiens GN=AZGP1 PE=1 SV=2	0.74	High-flux HD	Decreased
A0A0B4J1U7	Protein IGHV6-1 (Fragment) OS=Homo sapiens GN=IGHV6-1 PE=1 SV=1	0.75	High-flux HD	Decreased
G3V357	Ribonuclease pancreatic OS=Homo sapiens GN=RNASE1 PE=1 SV=1	0.75	High-flux HD	Decreased
P01009	Alpha-1-antitrypsin OS=Homo sapiens GN=SERPINA1 PE=1 SV=3	0.75	High-flux HD	Decreased
P51884	Lumican OS=Homo sapiens GN=LUM PE=1 SV=2	0.75	High-flux HD	Decreased
Q9NZP8	Complement C1r subcomponent-like protein OS=Homo sapiens GN=C1RL PE=1 SV=2	0.75	High-flux HD	Decreased
A0A0B4J231	Immunoglobulin lambda-like polypeptide 5 OS=Homo sapiens GN=IGLL5 PE=1 SV=1	0.75	High-flux HD	Decreased
P01593	Immunoglobulin kappa variable 1D-33 OS=Homo sapiens GN=IGKV1D-33 PE=1 SV=2	0.76	High-flux HD	Decreased
P04430	Immunoglobulin kappa variable 1-16 OS=Homo sapiens GN=IGKV1-16 PE=1 SV=2	0.76	High-flux HD	Decreased
P04432	Immunoglobulin kappa variable 1D-39 OS=Homo sapiens GN=IGKV1D-39 PE=3 SV=2	0.76	High-flux HD	Decreased
A0A075B6S5	Protein IGKV1-27 (Fragment) OS=Homo sapiens GN=IGKV1-27 PE=1 SV=1	0.76	High-flux HD	Decreased
M0R009	Alpha-1B-glycoprotein (Fragment) OS=Homo sapiens GN=A1BG PE=1 SV=8	0.76	High-flux HD	Decreased
A0A087WW87	Protein IGKV2-40 (Fragment) OS=Homo sapiens GN=IGKV2-40 PE=1 SV=1	0.77	High-flux HD	Decreased
P55058	Phospholipid transfer protein OS=Homo sapiens GN=PLTP PE=1 SV=1	0.78	High-flux HD	Decreased
A0A0A0MRD9	Haptoglobin-related protein OS=Homo sapiens GN=HPR PE=1 SV=1	0.78	High-flux HD	Decreased
C9JV77	Alpha-2-HS-glycoprotein OS=Homo sapiens GN=AHSG PE=1 SV=1	0.78	High-flux HD	Decreased
F8WCZ6	Complement C1s subcomponent OS=Homo sapiens GN=C1S PE=1 SV=1	0.78	High-flux HD	Decreased
A0M8Q6	Ig lambda-7 chain C region OS=Homo sapiens GN=IGLC7 PE=4 SV=2	0.79	High-flux HD	Decreased
P08519	Apolipoprotein(a) OS=Homo sapiens GN=LPA PE=1 SV=1	0.79	High-flux HD	Decreased
P13671	Complement component C6 OS=Homo sapiens GN=C6 PE=1 SV=3	0.79	High-flux HD	Decreased
F5H7G1	Complement component C8 beta chain OS=Homo sapiens GN=C8B PE=1 SV=1	0.79	High-flux HD	Decreased
H0Y300	Haptoglobin OS=Homo sapiens GN=HP PE=1 SV=4	0.79	High-flux HD	Decreased
P04196	Histidine-rich glycoprotein OS=Homo sapiens GN=HRG PE=1 SV=1	0.8	High-flux HD	Decreased
A0A075B6Q5	Immunoglobulin heavy variable 3-64 OS=Homo sapiens GN=IGHV3-64 PE=3 SV=1	0.81	High-flux HD	Decreased
P06310	Immunoglobulin kappa variable 2-30 OS=Homo sapiens GN=IGKV2-30 PE=3 SV=2	0.81	High-flux HD	Decreased
P80108	Phosphatidylinositol-glycan-specific phospholipase D OS=Homo sapiens GN=GPLD1 PE=1 SV=3	0.81	High-flux HD	Decreased
A0A0C4DH42	Protein IGHV3-66 (Fragment) OS=Homo sapiens GN=IGHV3-66 PE=4 SV=1	0.81	High-flux HD	Decreased
P01715	Immunoglobulin lambda variable 3-1 OS=Homo sapiens GN=IGLV3-1 PE=1 SV=2	0.81	High-flux HD	Decreased
P29622	Kallistatin OS=Homo sapiens GN=SERPINA4 PE=1 SV=3	0.81	High-flux HD	Decreased
A0A075B6N8	Ig gamma-3 chain C region (Fragment) OS=Homo sapiens GN=IGHG3 PE=1 SV=1	0.81	High-flux HD	Decreased
F5H2D0	Complement C1r subcomponent OS=Homo sapiens GN=C1R PE=1 SV=3	0.81	High-flux HD	Decreased
P02776	Platelet factor 4 OS=Homo sapiens GN=PF4 PE=1 SV=2	0.82	High-flux HD	Decreased
P04080	Cystatin-B OS=Homo sapiens GN=CSTB PE=1 SV=2	0.82	High-flux HD	Decreased
E9PN95	Uteroglobin OS=Homo sapiens GN=SCGB1A1 PE=1 SV=1	0.82	High-flux HD	Decreased
P01042	Kininogen-1 OS=Homo sapiens GN=KNG1 PE=1 SV=2	0.82	High-flux HD	Decreased
A0A0J9YVU5	Immunoglobulin heavy variable 2-70 (Fragment) OS=Homo sapiens GN=IGHV2-70 PE=4 SV=1	0.82	High-flux HD	Decreased
X6R8F3	Neutrophil gelatinase-associated lipocalin OS=Homo sapiens GN=LCN2 PE=1 SV=1	0.84	High-flux HD	Decreased
A0A0B4J2D9	Protein IGKV1D-13 (Fragment) OS=Homo sapiens GN=IGKV1D-13 PE=1 SV=1	0.84	High-flux HD	Decreased
P04220	Ig mu heavy chain disease protein OS=Homo sapiens PE=1 SV=1	0.85	High-flux HD	Decreased
A0A087WSY5	Carboxypeptidase B2 OS=Homo sapiens GN=CPB2 PE=1 SV=1	0.85	High-flux HD	Decreased
P19827	Inter-alpha-trypsin inhibitor heavy chain H1 OS=Homo sapiens GN=ITIH1 PE=1 SV=3	0.86	High-flux HD	Decreased
P01611	Immunoglobulin kappa variable 1D-12 OS=Homo sapiens GN=IGKV1D-12 PE=1 SV=2	0.88	High-flux HD	Decreased
P08603	Complement factor H OS=Homo sapiens GN=CFH PE=1 SV=4	0.88	High-flux HD	Decreased
P08185	Corticosteroid-binding globulin OS=Homo sapiens GN=SERPINA6 PE=1 SV=1	0.9	High-flux HD	Decreased
P22891	Vitamin K-dependent protein Z OS=Homo sapiens GN=PROZ PE=1 SV=2	0.91	High-flux HD	Decreased
E9PQD6	Serum amyloid A protein OS=Homo sapiens GN=SAA1 PE=1 SV=1	0.91	High-flux HD	Decreased
A0A0A0MRJ7	Coagulation factor V OS=Homo sapiens GN=F5 PE=1 SV=1	0.91	High-flux HD	Decreased
O75882	Attractin OS=Homo sapiens GN=ATRN PE=1 SV=2	0.92	High-flux HD	Decreased
P04217	Alpha-1B-glycoprotein OS=Homo sapiens GN=A1BG PE=1 SV=4	0.92	High-flux HD	Decreased
P80748	Immunoglobulin lambda variable 3-21 OS=Homo sapiens GN=IGLV3-21 PE=1 SV=2	0.92	High-flux HD	Decreased
A0A0J9YVT0	Immunoglobulin heavy variable 3-33 (Fragment) OS=Homo sapiens GN=IGHV3-33 PE=4 SV=1	0.94	High-flux HD	Decreased
A0A0A0MS15	Immunoglobulin heavy variable 3-49 OS=Homo sapiens GN=IGHV3-49 PE=1 SV=1	0.96	High-flux HD	Decreased
P98160	Basement membrane-specific heparan sulfate proteoglycan core protein OS=Homo sapiens GN=HSPG2 PE=1 SV=4	0.97	High-flux HD	Decreased
H0YA69	Matrix metalloproteinase-23 (Fragment) OS=Homo sapiens GN=MMP23B PE=1 SV=1	0.98	High-flux HD	Decreased
P41222	Prostaglandin-H2 D-isomerase OS=Homo sapiens GN=PTGDS PE=1 SV=1	0.99	High-flux HD	Decreased
P04264	Keratin, type II cytoskeletal 1 OS=Homo sapiens GN=KRT1 PE=1 SV=6	0.06	Low-flux HD	Decreased
P24592	Insulin-like growth factor-binding protein 6 OS=Homo sapiens GN=IGFBP6 PE=1 SV=1	0.47	Low-flux HD	Decreased
A0A0G2JRQ6	Uncharacterized protein (Fragment) OS=Homo sapiens PE=1 SV=4	0.62	Low-flux HD	Decreased
P01591	Immunoglobulin J chain OS=Homo sapiens GN=JCHAIN PE=1 SV=4	0.63	Low-flux HD	Decreased
P35908	Keratin, type II cytoskeletal 2 epidermal OS=Homo sapiens GN=KRT2 PE=1 SV=2	0.71	Low-flux HD	Decreased
P02743	Serum amyloid P-component OS=Homo sapiens GN=APCS PE=1 SV=2	0.74	Low-flux HD	Decreased
P0CF74	Ig lambda-6 chain C region OS=Homo sapiens GN=IGLC6 PE=4 SV=1	0.74	Low-flux HD	Decreased
A0A075B6L0	Ig lambda-3 chain C regions (Fragment) OS=Homo sapiens GN=IGLC3 PE=1 SV=2	0.74	Low-flux HD	Decreased
P01742	Immunoglobulin heavy variable 1-69 OS=Homo sapiens GN=IGHV1-69 PE=1 SV=2	0.75	Low-flux HD	Decreased
Q14520	Hyaluronan-binding protein 2 OS=Homo sapiens GN=HABP2 PE=1 SV=1	0.75	Low-flux HD	Decreased
B1AHL2	Fibulin-1 OS=Homo sapiens GN=FBLN1 PE=1 SV=1	0.77	Low-flux HD	Decreased
A0A0C4DH72	Protein IGKV1-6 (Fragment) OS=Homo sapiens GN=IGKV1-6 PE=4 SV=1	0.8	Low-flux HD	Decreased
A0A140TA44	Complement C4-A OS=Homo sapiens GN=C4A PE=1 SV=1	0.86	Low-flux HD	Decreased
P02787	Serotransferrin OS=Homo sapiens GN=TF PE=1 SV=3	0.88	Low-flux HD	Decreased
P01599	Immunoglobulin kappa variable 1-17 OS=Homo sapiens GN=IGKV1-17 PE=1 SV=2	0.9	Low-flux HD	Decreased
A0A0U1RQL8	Gelsolin (Fragment) OS=Homo sapiens GN=GSN PE=1 SV=1	0.91	Low-flux HD	Decreased
P01709	Immunoglobulin lambda variable 2-8 OS=Homo sapiens GN=IGLV2-8 PE=1 SV=2	0.91	Low-flux HD	Decreased
E9PBC5	Plasma kallikrein OS=Homo sapiens GN=KLKB1 PE=1 SV=2	0.91	Low-flux HD	Decreased
P20742	Pregnancy zone protein OS=Homo sapiens GN=PZP PE=1 SV=4	0.92	Low-flux HD	Decreased
P20851	C4b-binding protein beta chain OS=Homo sapiens GN=C4BPB PE=1 SV=1	0.93	Low-flux HD	Decreased
P00742	Coagulation factor X OS=Homo sapiens GN=F10 PE=1 SV=2	0.94	Low-flux HD	Decreased
P01344	Insulin-like growth factor II OS=Homo sapiens GN=IGF2 PE=1 SV=1	0.97	Low-flux HD	Decreased
P0DJI8	Serum amyloid A-1 protein OS=Homo sapiens GN=SAA1 PE=1 SV=1	0.97	Low-flux HD	Decreased
P07358	Complement component C8 beta chain OS=Homo sapiens GN=C8B PE=1 SV=3	0.98	Low-flux HD	Decreased
P01706	Immunoglobulin lambda variable 2-11 OS=Homo sapiens GN=IGLV2-11 PE=1 SV=2	0.99	Low-flux HD	Decreased
